# Supplementary material
Source: publisher figshare collection journal article supplement (https://f1000.figshare.com/ndownloader/files/1712634)
Supplement: Supplementary file 1 [file 1712634]

## Sheet: individual data
												gambiae specific allele	C	T	A	C	T	G	T	A	G
												coluzzii specific allele	T	A	C	T	A	A	G	G	T
banked_sample_id	coldate	collection_site	country	collection_site_lat	collection_site_long	sex	life_stage	food_state	Species	Plasmodium falciparum Infection	CSP concentration	Scott PCR	28SIGS-540	28SIGS-649	01039-358	01061-057	01061-488	01070-211	01073-073	01073-213	01076-129	28S_Fanello	28S_Favia	SINEX	28S_Seq
09CAN001	2009-11-07	Canjufa	Guinea-Bissau	12.4319	-14.1266	f	F0 adults	half-gravid	gambiae	NEG	-1.90008		CC	TT	AA	CC	TT	GG	TT	AA	GG	S	S
09CAN002	2009-11-07	Canjufa	Guinea-Bissau	12.4319	-14.1266	f	F0 adults	half-gravid	coluzzii	NEG	-1.19702		TT	AA	CC	TT	AA	AA	GG	GG	TT	hybrid
09CAN003	2009-11-07	Canjufa	Guinea-Bissau	12.4319	-14.1266	f	F0 adults	half-gravid	gambiae	POS	6.66541		CC	TT	AA	CC	TT	GG	TT	AA	GG	S	S
09CAN004	2009-11-07	Canjufa	Guinea-Bissau	12.4319	-14.1266	f	F0 adults	half-gravid	hybrid	POS	6.19672		CT	TA	AC	CT	TA	GG	TT	AG	GT	hybrid	hybrid
09BBD001	2009-11-08	Bambadinca	Guinea-Bissau	12.0223	-14.862	f	F0 adults	half-gravid	coluzzii	NEG	-1.06867		TT	AA	CC	TT	AA	AA	GG	GG	TT	M	M		M
09BBD002	2009-11-08	Bambadinca	Guinea-Bissau	12.0223	-14.862	f	F0 adults	half-gravid	coluzzii	NEG	-0.871258											M	M		M
09BBD003	2009-11-08	Bambadinca	Guinea-Bissau	12.0223	-14.862	f	F0 adults	half-gravid	coluzzii	NEG	-1.30615		TT	AA	CC	TT	AA	AA	GG	GG	TT	M	M		M
09BBD004	2009-11-08	Bambadinca	Guinea-Bissau	12.0223	-14.862	f	F0 adults	half-gravid	coluzzii	NEG	-1.13631											M	M		M
09BBD005	2009-11-08	Bambadinca	Guinea-Bissau	12.0223	-14.862	f	F0 adults	half-gravid	coluzzii	NEG	-0.883106		TT	AA	CC	TT	AA	AA	GG	GG	TT	M	M		M
09BBD006	2009-11-08	Bambadinca	Guinea-Bissau	12.0223	-14.862	f	F0 adults	half-gravid	coluzzii	NEG	-0.894924		TT	AA	CC	TT	AA	AA	GG	GG	TT	M	M		M
09BBD007	2009-11-08	Bambadinca	Guinea-Bissau	12.0223	-14.862	f	F0 adults	half-gravid	coluzzii	NEG	-0.847474											M	M		M
09BBD008	2009-11-08	Bambadinca	Guinea-Bissau	12.0223	-14.862	f	F0 adults	half-gravid	coluzzii	NEG	-1.30615											M	M		M
09BBD009	2009-11-08	Bambadinca	Guinea-Bissau	12.0223	-14.862	f	F0 adults	half-gravid	coluzzii	NEG	-0.615655											M	M		M
09BBD010	2009-11-08	Bambadinca	Guinea-Bissau	12.0223	-14.862	f	F0 adults	half-gravid	coluzzii	NEG	-1.11388											M	M		M
09BBD011	2009-11-08	Bambadinca	Guinea-Bissau	12.0223	-14.862	f	F0 adults	half-gravid	coluzzii	NEG	-0.763303											M	M
09BBD013	2009-11-08	Bambadinca	Guinea-Bissau	12.0223	-14.862	f	F0 adults	blood-fed	coluzzii	NEG	-1.26842											M	M
09BBD014	2009-11-08	Bambadinca	Guinea-Bissau	12.0223	-14.862	f	F0 adults	blood-fed	coluzzii	NEG	-0.918473											M	M
09BBD015	2009-11-08	Bambadinca	Guinea-Bissau	12.0223	-14.862	f	F0 adults	blood-fed	coluzzii	POS	0.611691											M	M
09BBD016	2009-11-08	Bambadinca	Guinea-Bissau	12.0223	-14.862	f	F0 adults	blood-fed	coluzzii	NEG	-0.817578											M	M
09BBD017	2009-11-08	Bambadinca	Guinea-Bissau	12.0223	-14.862	f	F0 adults	blood-fed	coluzzii	NEG	-0.67769											M	M
09BBD018	2009-11-08	Bambadinca	Guinea-Bissau	12.0223	-14.862	f	F0 adults	blood-fed	coluzzii	NEG	-1.18082											M	M
09BBD019	2009-11-08	Bambadinca	Guinea-Bissau	12.0223	-14.862	f	F0 adults	blood-fed	gambiae	NEG	-0.690009											S	S
09BBD020	2009-11-08	Bambadinca	Guinea-Bissau	12.0223	-14.862	f	F0 adults	blood-fed	coluzzii	POS	1.33744											M	M
09BBD051	2009-11-08	Bambadinca	Guinea-Bissau	12.0223	-14.862	f	F0 adults	half-gravid	pharoensis	NEG	-0.781461
09BBD052	2009-11-08	Bambadinca	Guinea-Bissau	12.0223	-14.862	f	F0 adults	half-gravid	pharoensis	NEG	-1.04017
09BBD053	2009-11-08	Bambadinca	Guinea-Bissau	12.0223	-14.862	f	F0 adults	half-gravid	pharoensis	NEG	-0.603159
09BBD055	2009-11-08	Bambadinca	Guinea-Bissau	12.0223	-14.862	f	F0 adults	blood-fed	pharoensis	POS	0.935284
09BBD056	2009-11-08	Bambadinca	Guinea-Bissau	12.0223	-14.862	f	F0 adults	blood-fed	pharoensis	POS	1.321
09BBD057	2009-11-08	Bambadinca	Guinea-Bissau	12.0223	-14.862	f	F0 adults	blood-fed	pharoensis	NEG	-1.1419
09ANT001	2009-11-05	Antula	Guinea-Bissau	11.9101	-15.5837	f	F0 adults	half-gravid	gambiae	NEG	-0.333958		CC	TT	AA			GG	TT	AA	GG	hybrid	S
09ANT002	2009-11-05	Antula	Guinea-Bissau	11.9101	-15.5837	f	F0 adults	half-gravid	gambiae	POS	2.92796		TC	AT	AA	CC	TT	GG	TT	AA	GG	hybrid	hybrid
09ANT003	2009-11-05	Antula	Guinea-Bissau	11.9101	-15.5837	f	F0 adults	half-gravid	coluzzii	NEG	-0.775416		TT	AA	CC	TT	AA	AA	GG	GG	TT	M	M		M
09ANT004	2009-11-05	Antula	Guinea-Bissau	11.9101	-15.5837	f	F0 adults	half-gravid	coluzzii	NEG	-0.775416		TT	AA	CC	TT	AA	AA	GG	GG	TT	M	M		M
09ANT005	2009-11-05	Antula	Guinea-Bissau	11.9101	-15.5837	f	F0 adults	half-gravid	hybrid	NEG	-0.527569		TC	AT	CA	TC	AT	GA	GT	AG	GT	hybrid	hybrid
09ANT006	2009-11-05	Antula	Guinea-Bissau	11.9101	-15.5837	f	F0 adults	half-gravid	gambiae	NEG	-1.07435		CC	TT	AA	CC	TT	GG	TT	AA	GG	S	S		S
09ANT007	2009-11-05	Antula	Guinea-Bissau	11.9101	-15.5837	f	F0 adults	half-gravid	gambiae	POS	0.589074		CC	TT	AA	CC	TT	GG	TT	AA	GG	S	S		S
09ANT008	2009-11-05	Antula	Guinea-Bissau	11.9101	-15.5837	f	F0 adults	half-gravid	coluzzii	NEG	-1.23033		TT	AA	CC	TT	AA	AA	GG	GG	TT	M	M		M
09ANT010	2009-11-05	Antula	Guinea-Bissau	11.9101	-15.5837	f	F0 adults	half-gravid	hybrid	NEG	-1.27924		TC	AT	CA	TC	AT	GA	GT	AG	GT	hybrid	S
09ANT011	2009-11-05	Antula	Guinea-Bissau	11.9101	-15.5837	f	F0 adults	half-gravid	gambiae	NEG	-1.31151		CC	TT	AA	CC	TT	GG	TT	AA	GG	S	S		S
09ANT012	2009-11-05	Antula	Guinea-Bissau	11.9101	-15.5837	f	F0 adults	half-gravid	hybrid	NEG	-1.23579		TC	AT	CC	TC	AT	GA	GT	AG	GT	hybrid	hybrid
09ANT013	2009-11-05	Antula	Guinea-Bissau	11.9101	-15.5837	f	F0 adults	half-gravid	gambiae	NEG	-1.30078		CC	TT	AA	CC	TT	GG	TT	AA	GG	S	S		S
09ANT014	2009-11-05	Antula	Guinea-Bissau	11.9101	-15.5837	f	F0 adults	half-gravid	gambiae	NEG	-0.720677		CC	TT	AA	CC	TT	GG	TT	AA	GG	S	S		S
09ANT015	2009-11-05	Antula	Guinea-Bissau	11.9101	-15.5837	f	F0 adults	half-gravid	gambiae	NEG	-0.883106		CC	TT	AA	CC	TT	GG	TT	AA	GG	S	S		S
09ANT016	2009-11-05	Antula	Guinea-Bissau	11.9101	-15.5837	f	F0 adults	half-gravid	coluzzii	NEG	-1.27383		TT	AA	CC	TT	AA	AA	GG	GG	TT	M	M		M
09ANT017	2009-11-05	Antula	Guinea-Bissau	11.9101	-15.5837	f	F0 adults	half-gravid	hybrid	NEG	-0.615655											hybrid
09ANT018	2009-11-05	Antula	Guinea-Bissau	11.9101	-15.5837	f	F0 adults	half-gravid	gambiae	NEG	-0.757236		CC	TT	AA	CC	TT	GG	TT	AA	GG	S	hybrid		S
09ANT019	2009-11-05	Antula	Guinea-Bissau	11.9101	-15.5837	f	F0 adults	half-gravid	gambiae	NEG	-1.33821		CC	TT	AA	CC	TT	GG	TT	AA	GG	S	S		S
09ANT020	2009-11-05	Antula	Guinea-Bissau	11.9101	-15.5837	f	F0 adults	half-gravid	hybrid	NEG	-0.379726		TC	AT	CA	TC	AT	GA	GT	AG	GT	hybrid	S		M/S Hybrid
09ANT021	2009-11-05	Antula	Guinea-Bissau	11.9101	-15.5837	f	F0 adults	half-gravid	coluzzii	NEG	-1.27924		TT	AA	CC	TT	AA	AA	GG	GG	TT	M	M		M
09ANT022	2009-11-05	Antula	Guinea-Bissau	11.9101	-15.5837	f	F0 adults	half-gravid	coluzzii	NEG	-1.69262		TT	AA	CC	TT	AA	AA	GG	GG	TT	M	M		M
09ANT023	2009-11-05	Antula	Guinea-Bissau	11.9101	-15.5837	f	F0 adults	half-gravid	gambiae	NEG	-0.799553		CC	TT	AA	CC	TT	GG	TT	AA	GG	S	S		S
09ANT024	2009-11-05	Antula	Guinea-Bissau	11.9101	-15.5837	f	F0 adults	half-gravid	gambiae	NEG	-0.953575		CC	TT	AA	CC	TT	GG	TT	AA	GG	S	S		S
09ANT025	2009-11-05	Antula	Guinea-Bissau	11.9101	-15.5837	f	F0 adults	half-gravid	hybrid	NEG	-0.953575		TC	AT	CA	TC	AT	GA	GT	AG	GT	hybrid
09ANT026	2009-11-05	Antula	Guinea-Bissau	11.9101	-15.5837	f	F0 adults	half-gravid	melas	POS	0.998393	Melas
09ANT027	2009-11-05	Antula	Guinea-Bissau	11.9101	-15.5837	f	F0 adults	half-gravid	hybrid	NEG	-1.1419											M/hybrid ?	hybrid
09ANT028	2009-11-05	Antula	Guinea-Bissau	11.9101	-15.5837	f	F0 adults	half-gravid	gambiae	NEG	-1.46892		CC	TT	AA	CC	TT	GG	TT	AA	GG	hybrid	S		S
09ANT029	2009-11-05	Antula	Guinea-Bissau	11.9101	-15.5837	f	F0 adults	half-gravid	gambiae	NEG	-1.29541		CC	TT	AA	CC	TT	GG	TT	AA	GG	hybrid	S		mixed seq
09ANT030	2009-11-05	Antula	Guinea-Bissau	11.9101	-15.5837	f	F0 adults	half-gravid	coluzzii	NEG	-1.54514		TT	AT	CC	TT	AA	AA	GG	GG	TT	M	M		M
09ANT031	2009-11-05	Antula	Guinea-Bissau	11.9101	-15.5837	f	F0 adults	half-gravid	coluzzii	NEG	-1.23579		TT	AA	CC	TT	AA	AA	GG	GG	TT	M	M		M
09ANT032	2009-11-05	Antula	Guinea-Bissau	11.9101	-15.5837	f	F0 adults	half-gravid	gambiae	POS	0.44737											?;?
09ANT033	2009-11-05	Antula	Guinea-Bissau	11.9101	-15.5837	f	F0 adults	half-gravid	hybrid	NEG	-1.15862		TC	AT	CA	TC	AT	GA	GT	AG	GT	M	hybrid		M/S Hybrid
09ANT034	2009-11-05	Antula	Guinea-Bissau	11.9101	-15.5837	f	F0 adults	half-gravid	coluzzii	NEG	-1.06867		TT	AA	CC	TT	AA	AA	GG	GG	TT	M	M		M
09ANT035	2009-11-05	Antula	Guinea-Bissau	11.9101	-15.5837	f	F0 adults	half-gravid	gambiae sensu lato	POS	0.272172	no amplification										?;?
09ANT036	2009-11-05	Antula	Guinea-Bissau	11.9101	-15.5837	f	F0 adults	half-gravid	gambiae	NEG	-1.13071		CC	TT	AA	CC	TT	GG	TT	AA	GG	S	S		S
09ANT037	2009-11-05	Antula	Guinea-Bissau	11.9101	-15.5837	f	F0 adults	half-gravid	gambiae	NEG	-1.21938		CC	TT	AA	CC	TT	GG	TT	AA	GG	hybrid	S		S
09ANT038	2009-11-05	Antula	Guinea-Bissau	11.9101	-15.5837	f	F0 adults	half-gravid	gambiae	NEG	-1.01149											M			M
09ANT039	2009-11-05	Antula	Guinea-Bissau	11.9101	-15.5837	f	F0 adults	half-gravid	gambiae	NEG	-1.02298											S			S
09ANT040	2009-11-05	Antula	Guinea-Bissau	11.9101	-15.5837	f	F0 adults	half-gravid	hybrid	NEG	-0.757236		TC	AT	CA			GA	GT	AG	GT	hybrid	S
09ANT041	2009-11-05	Antula	Guinea-Bissau	11.9101	-15.5837	f	F0 adults	blood-fed	gambiae	NEG	-1.25757		CC	TT	AA	CC	TT	GG	GT	AA	GG	S	S
09ANT043	2009-11-05	Antula	Guinea-Bissau	11.9101	-15.5837	f	F0 adults	blood-fed	hybrid	NEG	-1.26842		TC	AT	CA			GA	GT	AG	GT	hybrid	hybrid
09ANT044	2009-11-05	Antula	Guinea-Bissau	11.9101	-15.5837	f	F0 adults	blood-fed	gambiae	POS	0.0521481		CC	TT	AA	CC	TT	GG	TT	AA	GG	S	S		S
09ANT046	2009-11-05	Antula	Guinea-Bissau	11.9101	-15.5837	f	F0 adults	blood-fed	gambiae	POS	1.22298
09ANT047	2009-11-05	Antula	Guinea-Bissau	11.9101	-15.5837	f	F0 adults	blood-fed	gambiae	NEG	-0.805569
09ANT048	2009-11-05	Antula	Guinea-Bissau	11.9101	-15.5837	f	F0 adults	blood-fed	gambiae	NEG	-1.54514											S	S		S
09ANT061	2009-11-05	Antula	Guinea-Bissau	11.9101	-15.5837	f	F0 adults	blood-fed	gambiae	NEG	-1.42759											S	S		S
09ANT062	2009-11-05	Antula	Guinea-Bissau	11.9101	-15.5837	f	F0 adults	blood-fed	gambiae	NEG	-1.06867		CC	TT	AA	CC	TT	GG	TT	AA	GG	S	S		S
09ANT063	2009-11-05	Antula	Guinea-Bissau	11.9101	-15.5837	f	F0 adults	blood-fed	coluzzii	NEG	-0.751161		TT	AA	CC	TT	AA	AA	GG	GG	TT	M	M		M
09ANT105	2009-11-10	Antula	Guinea-Bissau	11.9101	-15.5837	f	F0 adults	half-gravid	gambiae	NEG	-1.06298		CC	TT	AA	CC	TT	GG	TT	AA	GG	S	S		S
09ANT106	2009-11-10	Antula	Guinea-Bissau	11.9101	-15.5837	f	F0 adults	half-gravid	hybrid	NEG	-1.11388		TC	TT	CA	TC	AT	GA	GT	AG	GT	hybrid	S
09ANT107	2009-11-10	Antula	Guinea-Bissau	11.9101	-15.5837	f	F0 adults	half-gravid	gambiae	NEG	-1.29541		TC	TT	AA	CC	TT	GG	TT	AA	GG	hybrid	S
09ANT108	2009-11-10	Antula	Guinea-Bissau	11.9101	-15.5837	f	F0 adults	half-gravid	gambiae	NEG	-1.2467		TC	AT	AA	CC	TT	GG	TT	AA	GG	hybrid	S
09ANT109	2009-11-10	Antula	Guinea-Bissau	11.9101	-15.5837	f	F0 adults	half-gravid	gambiae	NEG	-1.44832		CC	TT	AA	CC	TT	GG	TT	AA	GG	S	S
09ANT110	2009-11-10	Antula	Guinea-Bissau	11.9101	-15.5837	f	F0 adults	half-gravid	hybrid	NEG	-1.2029		TC	AT	CA	CC	AT	GA	GT	AG	GT	hybrid	hybrid
09ANT113	2009-11-10	Antula	Guinea-Bissau	11.9101	-15.5837	f	F0 adults	half-gravid	gambiae	NEG	-1.46612		CC	TT	AA	CC	TT	GG	TT	AA	GG	S	S
09ANT114	2009-11-10	Antula	Guinea-Bissau	11.9101	-15.5837	f	F0 adults	half-gravid	hybrid	POS	21.2173		TC	AT	CA	TC	AT	GA	GT	AG	GT	hybrid	hybrid
09ANT115	2009-11-10	Antula	Guinea-Bissau	11.9101	-15.5837	f	F0 adults	half-gravid	gambiae	POS	2.06787											S
09ANT116	2009-11-10	Antula	Guinea-Bissau	11.9101	-15.5837	f	F0 adults	half-gravid	gambiae	POS	0.303366											S
09ANT117	2009-11-10	Antula	Guinea-Bissau	11.9101	-15.5837	f	F0 adults	half-gravid	coluzzii	NEG	-0.826559		TT	AA	CC	TT	AA	AA	GG	GG	TT	M	M		M
09ANT119	2009-11-10	Antula	Guinea-Bissau	11.9101	-15.5837	f	F0 adults	half-gravid	gambiae	NEG	-1.35692		TC	AT	AA	CC	TT	GG	TT	AA	GG	hybrid	hybrid
09ANT120	2009-11-10	Antula	Guinea-Bissau	11.9101	-15.5837	f	F0 adults	half-gravid	gambiae	POS	2.55311	Gambiae											no amplification	S
09ANT121	2009-11-10	Antula	Guinea-Bissau	11.9101	-15.5837	f	F0 adults	half-gravid	hybrid	NEG	-1.91997		TC	AT	AA	TC	AT	GA	??	AG	GT	hybrid	hybrid
09ANT122	2009-11-10	Antula	Guinea-Bissau	11.9101	-15.5837	f	F0 adults	half-gravid	gambiae	NEG	-1.59659		TC	AT	AA	CC	TT	GG	TT	AA	GG	hybrid	hybrid
09ANT123	2009-11-10	Antula	Guinea-Bissau	11.9101	-15.5837	f	F0 adults	half-gravid	gambiae	NEG	-1.49517											S
09ANT124	2009-11-10	Antula	Guinea-Bissau	11.9101	-15.5837	f	F0 adults	half-gravid	hybrid	NEG	-2.31683		TC	AT	CA	TC	AT	GA	GT	AG	GT	hybrid	hybrid
09ANT125	2009-11-10	Antula	Guinea-Bissau	11.9101	-15.5837	f	F0 adults	half-gravid	gambiae	NEG	-1.77673											S
09ANT126	2009-11-10	Antula	Guinea-Bissau	11.9101	-15.5837	f	F0 adults	half-gravid	hybrid	NEG	-0.923072		TC	AT	CA	TC	AT	GA	GT	AG	GT	hybrid	hybrid
09ANT127	2009-11-10	Antula	Guinea-Bissau	11.9101	-15.5837	f	F0 adults	half-gravid	hybrid	NEG	-1.3058		TC	AT	CA	TC	AT	GA	GT	AG	??	hybrid	hybrid
09ANT128	2009-11-10	Antula	Guinea-Bissau	11.9101	-15.5837	f	F0 adults	half-gravid	gambiae	NEG	-1.22528		TC	AT	AA	CC	TT	GG	TT	AA	GG	hybrid	hybrid
09ANT129	2009-11-10	Antula	Guinea-Bissau	11.9101	-15.5837	f	F0 adults	half-gravid	gambiae	NEG	-1.73361											S
09ANT130	2009-11-10	Antula	Guinea-Bissau	11.9101	-15.5837	f	F0 adults	half-gravid	gambiae	NEG	-1.05616											S
09ANT131	2009-11-10	Antula	Guinea-Bissau	11.9101	-15.5837	f	F0 adults	half-gravid	coluzzii	NEG	-0.752092		TT	AA	CC	TT	AA	AA	GG	GG	TT	M	M		M
09ANT132	2009-11-10	Antula	Guinea-Bissau	11.9101	-15.5837	f	F0 adults	half-gravid	hybrid	NEG	-1.6688		TC	AT	AA	CC	AT	GA	TT	AA	??	hybrid	hybrid
09ANT133	2009-11-10	Antula	Guinea-Bissau	11.9101	-15.5837	f	F0 adults	half-gravid	hybrid	NEG	-1.12246		TC	AT	CA	TC	AT	GA	??	AG	GT	hybrid	hybrid
09ANT134	2009-11-10	Antula	Guinea-Bissau	11.9101	-15.5837	f	F0 adults	half-gravid	gambiae	NEG	-0.989694											S
09ANT135	2009-11-10	Antula	Guinea-Bissau	11.9101	-15.5837	f	F0 adults	half-gravid	gambiae	NEG	-1.66158											S
09ANT136	2009-11-10	Antula	Guinea-Bissau	11.9101	-15.5837	f	F0 adults	half-gravid	gambiae	POS	2.32197											S
09ANT137	2009-11-10	Antula	Guinea-Bissau	11.9101	-15.5837	f	F0 adults	half-gravid	gambiae	NEG	-1.67601											S
09ANT138	2009-11-10	Antula	Guinea-Bissau	11.9101	-15.5837	f	F0 adults	half-gravid	coluzzii	NEG	-1.91997		TT	AA	CC	TT	AA	AA	GG	GG	TT	M	M
09ANT140	2009-11-10	Antula	Guinea-Bissau	11.9101	-15.5837	f	F0 adults	half-gravid	gambiae	NEG	-1.94852											S
09ANT141	2009-11-10	Antula	Guinea-Bissau	11.9101	-15.5837	f	F0 adults	half-gravid	hybrid	NEG	-1.96278											M			M/S Hybrid
09ANT142	2009-11-10	Antula	Guinea-Bissau	11.9101	-15.5837	f	F0 adults	half-gravid	gambiae	NEG	-1.40794											S
09ANT143	2009-11-10	Antula	Guinea-Bissau	11.9101	-15.5837	f	F0 adults	half-gravid	gambiae	NEG	-2.02687											S
09ANT144	2009-11-10	Antula	Guinea-Bissau	11.9101	-15.5837	f	F0 adults	half-gravid	gambiae	NEG	-1.91997											S
09ANT145	2009-11-10	Antula	Guinea-Bissau	11.9101	-15.5837	f	F0 adults	half-gravid	gambiae	NEG	-2.35898											S
09ANT146	2009-11-10	Antula	Guinea-Bissau	11.9101	-15.5837	f	F0 adults	half-gravid	hybrid	NEG	-1.99129		TC	AT	CA	TC	AT	GA	GT	AG	GT	hybrid	hybrid
09ANT147	2009-11-10	Antula	Guinea-Bissau	11.9101	-15.5837	f	F0 adults	half-gravid	gambiae	NEG	-2.0908		TC	AT	AA	CC	TT	GG	TT	AA	GG	hybrid	hybrid
09ANT148	2009-11-10	Antula	Guinea-Bissau	11.9101	-15.5837	f	F0 adults	half-gravid	gambiae	NEG	-2.197											S/hybrid ?	S/hybrid		S
09ANT149	2009-11-10	Antula	Guinea-Bissau	11.9101	-15.5837	f	F0 adults	half-gravid	coluzzii	NEG	-2.03398		TC	AT	CC	TT	AA	AA	GG	GG	TT	M	hybrid		M/S Hybrid
09ANT150	2009-11-10	Antula	Guinea-Bissau	11.9101	-15.5837	f	F0 adults	half-gravid	gambiae	POS	14.7118											S
09ANT151	2009-11-10	Antula	Guinea-Bissau	11.9101	-15.5837	f	F0 adults	half-gravid	gambiae	POS	0.55173											S/hybrid ?	S/hybrid		S
09ANT152	2009-11-10	Antula	Guinea-Bissau	11.9101	-15.5837	f	F0 adults	half-gravid	gambiae	NEG	-2.0979											?;?
09ANT153	2009-11-10	Antula	Guinea-Bissau	11.9101	-15.5837	f	F0 adults	half-gravid	coluzzii	NEG	-2.38705		TT	AA	CC	TT	AA	AA	GG	GG	TT	M	M		M
09ANT154	2009-11-10	Antula	Guinea-Bissau	11.9101	-15.5837	f	F0 adults	half-gravid	gambiae	NEG	-1.71202											S
09ANT155	2009-11-10	Antula	Guinea-Bissau	11.9101	-15.5837	f	F0 adults	half-gravid	gambiae	NEG	-2.39406											S
09ANT156	2009-11-10	Antula	Guinea-Bissau	11.9101	-15.5837	f	F0 adults	half-gravid	hybrid	NEG	-1.13717		TC	TT	CA	TC	AT	GA	GT	AG	GT	hybrid	S
09ANT157	2009-11-10	Antula	Guinea-Bissau	11.9101	-15.5837	f	F0 adults	half-gravid	gambiae	POS	0.56732		CC	TT	AA	CC	TT	GG	TT	AA	GG	S	S		S
09ANT158	2009-11-10	Antula	Guinea-Bissau	11.9101	-15.5837	f	F0 adults	half-gravid	hybrid	NEG	-2.42908		TC	AT	CA	TC	AT	GA	GT	AG	GT	hybrid	hybrid
09ANT159	2009-11-10	Antula	Guinea-Bissau	11.9101	-15.5837	f	F0 adults	half-gravid	melas	NEG	-1.68321	Melas
09ANT160	2009-11-10	Antula	Guinea-Bissau	11.9101	-15.5837	f	F0 adults	half-gravid	gambiae	NEG	-1.90568											?;?
09ANT161	2009-11-10	Antula	Guinea-Bissau	11.9101	-15.5837	f	F0 adults	half-gravid	gambiae	NEG	-1.96278											S/hybrid ?
09ANT162	2009-11-10	Antula	Guinea-Bissau	11.9101	-15.5837	f	F0 adults	half-gravid	gambiae	NEG	-2.21819											S/hybrid ?
09ANT163	2009-11-10	Antula	Guinea-Bissau	11.9101	-15.5837	f	F0 adults	half-gravid	gambiae sensu lato	NEG	-1.76955												NO RESULT
09ANT164	2009-11-10	Antula	Guinea-Bissau	11.9101	-15.5837	f	F0 adults	half-gravid	gambiae	NEG	-1.70482											S
09ANT165	2009-11-10	Antula	Guinea-Bissau	11.9101	-15.5837	f	F0 adults	half-gravid	hybrid	NEG	-2.21113											hybrid
09ANT166	2009-11-10	Antula	Guinea-Bissau	11.9101	-15.5837	f	F0 adults	half-gravid	hybrid	NEG	-2.12625											hybrid
09ANT167	2009-11-10	Antula	Guinea-Bissau	11.9101	-15.5837	f	F0 adults	half-gravid	gambiae	NEG	-1.97704											S/hybrid ?
09ANT168	2009-11-10	Antula	Guinea-Bissau	11.9101	-15.5837	f	F0 adults	half-gravid	gambiae	NEG	-1.95565											S
09ANT169	2009-11-10	Antula	Guinea-Bissau	11.9101	-15.5837	f	F0 adults	half-gravid	gambiae	NEG	-1.84129											S/hybrid ?
09ANT170	2009-11-10	Antula	Guinea-Bissau	11.9101	-15.5837	f	F0 adults	half-gravid	gambiae	NEG	-2.12625											S/hybrid ?
09ANT171	2009-11-10	Antula	Guinea-Bissau	11.9101	-15.5837	f	F0 adults	half-gravid	gambiae	NEG	-1.32042											S
09ANT172	2009-11-10	Antula	Guinea-Bissau	11.9101	-15.5837	f	F0 adults	half-gravid	coluzzii	NEG	-1.72642		TT	AA	CC	TT	AA	AA	GG	GG	TT	M	M		M
09ANT173	2009-11-10	Antula	Guinea-Bissau	11.9101	-15.5837	f	F0 adults	half-gravid	gambiae	NEG	-2.05531											S/hybrid ?
09ANT174	2009-11-10	Antula	Guinea-Bissau	11.9101	-15.5837	f	F0 adults	half-gravid	gambiae	POS	3.50159											S/hybrid ?
09ANT175	2009-11-10	Antula	Guinea-Bissau	11.9101	-15.5837	f	F0 adults	half-gravid	hybrid	NEG	-0.826559		TC	AT	CA	TC	AT	GA	GT	AG	GT	hybrid	hybrid
09ANT176	2009-11-10	Antula	Guinea-Bissau	11.9101	-15.5837	f	F0 adults	half-gravid	gambiae	NEG	-2.21113		TC	AT	AA	CC	TT	GG	TT	AA	GG	hybrid	hybrid
09ANT177	2009-11-10	Antula	Guinea-Bissau	11.9101	-15.5837	f	F0 adults	half-gravid	gambiae	NEG	-1.76237											S	S
09ANT178	2009-11-10	Antula	Guinea-Bissau	11.9101	-15.5837	f	F0 adults	half-gravid	gambiae	NEG	-1.73361											S	S
09ANT179	2009-11-10	Antula	Guinea-Bissau	11.9101	-15.5837	f	F0 adults	half-gravid	gambiae	NEG	-1.49517											S	S
09ANT180	2009-11-10	Antula	Guinea-Bissau	11.9101	-15.5837	f	F0 adults	half-gravid	gambiae	NEG	-1.53868											S	S
09ANT181	2009-11-10	Antula	Guinea-Bissau	11.9101	-15.5837	f	F0 adults	half-gravid	gambiae	NEG	-1.94138											?;?	S/hybrid
09ANT182	2009-11-10	Antula	Guinea-Bissau	11.9101	-15.5837	f	F0 adults	half-gravid	gambiae	NEG	-2.38003		TC	AT	AA	CC	TT	GG	TT	AA	GG	hybrid	hybrid
09ANT183	2009-11-10	Antula	Guinea-Bissau	11.9101	-15.5837	f	F0 adults	half-gravid	coluzzii	NEG	-1.13717		TT	AA	CC	TT	AA	AA	GG	GG	TT	M	M		M
09ANT184	2009-11-10	Antula	Guinea-Bissau	11.9101	-15.5837	f	F0 adults	half-gravid	melas	NEG	-1.96278	Melas
09ANT185	2009-11-10	Antula	Guinea-Bissau	11.9101	-15.5837	f	F0 adults	half-gravid	hybrid	NEG	-1.78392		TC	AT	CA	TC	AT	GA	GT	AG	GT	hybrid	hybrid
09PRA001	2009-11-06	Prabis	Guinea-Bissau	11.8007	-15.7433	f	F0 adults	half-gravid	coluzzii	NEG	-2.80028		TT	AA	CC	TT	AA	AA	GG	GG	TT	M	M
09PRA002	2009-11-06	Prabis	Guinea-Bissau	11.8007	-15.7433	f	F0 adults	half-gravid	gambiae	NEG	-2.7198		CC	TT	AA	CC	TT	GG	TT	AA	GG	S	S
09PRA003	2009-11-06	Prabis	Guinea-Bissau	11.8007	-15.7433	f	F0 adults	half-gravid	hybrid	NEG	-4.21011		CT	TA	AC	CT	TA	GA	TG	AG	GT	hybrid	hybrid
09PRA004	2009-11-06	Prabis	Guinea-Bissau	11.8007	-15.7433	f	F0 adults	half-gravid	coluzzii	NEG	-1.99365		TT	AA	CC	TT	AA	AA	GG	GG	TT	M	M
09PRA005	2009-11-06	Prabis	Guinea-Bissau	11.8007	-15.7433	f	F0 adults	half-gravid	coluzzii	NEG	-3.04148		TT	AA	CC	TT	AA	AA	GG	GG	TT	M	M
09PRA006	2009-11-06	Prabis	Guinea-Bissau	11.8007	-15.7433	f	F0 adults	half-gravid	gambiae	NEG	-5.38592		CC	TT	AA	CC	TT	GG	TT	AA	GG	hybrid	hybrid
09PRA007	2009-11-06	Prabis	Guinea-Bissau	11.8007	-15.7433	f	F0 adults	half-gravid	hybrid	NEG	-2.92897		CC	TT	AC	CT	TA	GA	TG	AG	GT	S/hybrid ?	hybrid
09PRA008	2009-11-06	Prabis	Guinea-Bissau	11.8007	-15.7433	f	F0 adults	half-gravid	melas	NEG	-2.63928	Melas
09PRA009	2009-11-06	Prabis	Guinea-Bissau	11.8007	-15.7433	f	F0 adults	half-gravid	coluzzii	NEG	-3.57084		TT	AA	CC	TT	AA	AA	GG	GG	TT	M	M
09PRA010	2009-11-06	Prabis	Guinea-Bissau	11.8007	-15.7433	f	F0 adults	half-gravid	coluzzii	NEG	-2.81638		TT	AA	CC	TT	AA	AA	GG	GG	TT	M	M
09PRA011	2009-11-06	Prabis	Guinea-Bissau	11.8007	-15.7433	f	F0 adults	half-gravid	gambiae	NEG	-3.98666		CC	TT	AA	CC	TT	GG	TT	AA	GG	S	S
09PRA012	2009-11-06	Prabis	Guinea-Bissau	11.8007	-15.7433	f	F0 adults	half-gravid	gambiae	NEG	-2.9772		CC	TT	AA	CC	TT	GG	TT	AA	GG	S	S
09PRA013	2009-11-06	Prabis	Guinea-Bissau	11.8007	-15.7433	f	F0 adults	half-gravid	gambiae	NEG	-3.52279		CC	TT	AA	CC	TT	GG	TT	AA	GG	S	S
09PRA014	2009-11-06	Prabis	Guinea-Bissau	11.8007	-15.7433	f	F0 adults	half-gravid	gambiae	NEG	-5.74957		CC	TT	AA	CC	TT	GG	TT	AA	GG	S	S
09PRA015	2009-11-06	Prabis	Guinea-Bissau	11.8007	-15.7433	f	F0 adults	half-gravid	gambiae	NEG	-2.84855		CC	TT	AA	CC	TT	GG	TT	AA	GG	S/hybrid ?	S/hybrid ?
09PRA016	2009-11-06	Prabis	Guinea-Bissau	11.8007	-15.7433	f	F0 adults	half-gravid	hybrid	NEG	-1.86421		CT	TA	AC	CT	TA	GA	TG	AG	GT	hybrid	hybrid
09PRA017	2009-11-06	Prabis	Guinea-Bissau	11.8007	-15.7433	f	F0 adults	half-gravid	hybrid	NEG	-3.1218		CC	TA	AC	CT	TA	GA	TG	AG	GT	hybrid	hybrid
09PRA018	2009-11-06	Prabis	Guinea-Bissau	11.8007	-15.7433	f	F0 adults	half-gravid	coluzzii	NEG	-4.0186		TT	AA	CC	TT	AA	AA	GG	GG	TT	M	M
09PRA019	2009-11-06	Prabis	Guinea-Bissau	11.8007	-15.7433	f	F0 adults	half-gravid	gambiae	NEG	-3.39458		CC	TT	AA	CC	TT	GG	TT	AA	GG	S	S
09PRA020	2009-11-06	Prabis	Guinea-Bissau	11.8007	-15.7433	f	F0 adults	half-gravid	gambiae	NEG	-3.76289		CC	TT	AA	CC	TT	GG	TT	AA	GG	S/hybrid ?	S/hybrid ?
09PRA021	2009-11-06	Prabis	Guinea-Bissau	11.8007	-15.7433	f	F0 adults	half-gravid	gambiae	NEG	-4.2739		CC	TT	AA	CC	TT	GG	TT	AA	GG	S	S
09PRA022	2009-11-06	Prabis	Guinea-Bissau	11.8007	-15.7433	f	F0 adults	half-gravid	coluzzii	NEG	-5.51251		TT	AA	CC	TT	AA	AA	GG	GG	TT	M	hybrid
09PRA023	2009-11-06	Prabis	Guinea-Bissau	11.8007	-15.7433	f	F0 adults	half-gravid	coluzzii	NEG	-3.6989		TT	AA	CC	TT	AA	AA	GG	GG	TT	M	M
09PRA024	2009-11-06	Prabis	Guinea-Bissau	11.8007	-15.7433	f	F0 adults	half-gravid	gambiae	NEG	-2.7359		CC	TT	AA	CC	TT	GG	TT	AA	GG	S	S
09PRA025	2009-11-06	Prabis	Guinea-Bissau	11.8007	-15.7433	f	F0 adults	half-gravid	melas	NEG	-3.57084	Melas
09PRA026	2009-11-06	Prabis	Guinea-Bissau	11.8007	-15.7433	f	F0 adults	half-gravid	coluzzii	NEG	-3.93874		TT	AA	CC	TT	AA	AA	GG	GG	TT	M	M
09PRA027	2009-11-06	Prabis	Guinea-Bissau	11.8007	-15.7433	f	F0 adults	half-gravid	gambiae	NEG	-4.40139		CC	TT	AA	CC	TT	GG	TT	AA	GG	S	S
09PRA028	2009-11-06	Prabis	Guinea-Bissau	11.8007	-15.7433	f	F0 adults	half-gravid	coluzzii	NEG	-3.39458		TT	AA	CC	TT	AA	AA	GG	GG	TT	M	M
09PRA029	2009-11-06	Prabis	Guinea-Bissau	11.8007	-15.7433	f	F0 adults	half-gravid	gambiae	NEG	-4.03457		CC	TT	AA	CC	TT	GG	TT	AA	GG	S	S
09PRA030	2009-11-06	Prabis	Guinea-Bissau	11.8007	-15.7433	f	F0 adults	half-gravid	coluzzii	NEG	-7.74207		TT	AA	CC	TT	AA	AA	GG	GG	TT	M	M
09PRA031	2009-11-06	Prabis	Guinea-Bissau	11.8007	-15.7433	f	F0 adults	half-gravid	gambiae	NEG	-4.46509		CC	TT	AA	CC	TT	GG	TT	AA	GG	S/hybrid ?	hybrid
09PRA032	2009-11-06	Prabis	Guinea-Bissau	11.8007	-15.7433	f	F0 adults	half-gravid	gambiae	NEG	-2.99327		CC	TT	AA	CC	TT	GG	TT	AA	GG	S	S
09PRA034	2009-11-06	Prabis	Guinea-Bissau	11.8007	-15.7433	f	F0 adults	half-gravid	gambiae	NEG	-3.10574		CC	TT	AA	CC	TT	GG	TT	AA	GG	S	S
09PRA035	2009-11-06	Prabis	Guinea-Bissau	11.8007	-15.7433	f	F0 adults	half-gravid	coluzzii	NEG	-4.57652		TT	AA	CC	TT	AA	AA	GG	GG	TT	M	M
09PRA036	2009-11-06	Prabis	Guinea-Bissau	11.8007	-15.7433	f	F0 adults	half-gravid	gambiae	NEG	-3.92276		CT	TA	AA	CC	TT	GG	TT	AA	GG	hybrid	hybrid
09PRA037	2009-11-06	Prabis	Guinea-Bissau	11.8007	-15.7433	f	F0 adults	half-gravid	gambiae	NEG	-3.13786		CC	TT	AA	CC	TT	GG	TT	AA	GG	S	S
09PRA038	2009-11-06	Prabis	Guinea-Bissau	11.8007	-15.7433	f	F0 adults	half-gravid	gambiae	NEG	-6.42713		CC	TT	AA	CC	TT	GG	TT	AA	GG	S	S
09PRA039	2009-11-06	Prabis	Guinea-Bissau	11.8007	-15.7433	f	F0 adults	half-gravid	melas	POS	5.02649	Melas
09PRA040	2009-11-06	Prabis	Guinea-Bissau	11.8007	-15.7433	f	F0 adults	half-gravid	coluzzii	NEG	-2.6715		TT	AA	CC	TT	AA	AA	GG	GG	TT	M	M
09PRA041	2009-11-06	Prabis	Guinea-Bissau	11.8007	-15.7433	f	F0 adults	half-gravid	gambiae	NEG	-3.13786		CC	TT	AC	CC	TT	GG	TT	AA	GG	hybrid	S
09PRA042	2009-11-06	Prabis	Guinea-Bissau	11.8007	-15.7433	f	F0 adults	half-gravid	coluzzii	NEG	-4.25795		TT	AA	CC	TT	AA	AA	GG	GG	TT	M	M
09PRA043	2009-11-06	Prabis	Guinea-Bissau	11.8007	-15.7433	f	F0 adults	half-gravid	coluzzii	NEG	-3.82686		TT	AA	CC	TT	AA	AA	GG	GG	TT	M	?;?
09PRA044	2009-11-06	Prabis	Guinea-Bissau	11.8007	-15.7433	f	F0 adults	half-gravid	coluzzii	NEG	-4.67196		TT	AA	CC	TT	AA	AA	GG	GG	TT	M	M
09PRA045	2009-11-06	Prabis	Guinea-Bissau	11.8007	-15.7433	f	F0 adults	half-gravid	gambiae	NEG	-4.65606		CC	TT	AA	CC	TT	GG	TT	AA	GG	hybrid	S
09PRA047	2009-11-06	Prabis	Guinea-Bissau	11.8007	-15.7433	f	F0 adults	half-gravid	gambiae	POS	0.417758		CC	TT	AA	CC	TT	GG	TT	AA	GG	S/hybrid ?	S
09PRA048	2009-11-06	Prabis	Guinea-Bissau	11.8007	-15.7433	f	F0 adults	half-gravid	gambiae	NEG	-4.24201		CC	TT	AA	CC	TT	GG	TT	AA	GG	S	S
09PRA049	2009-11-06	Prabis	Guinea-Bissau	11.8007	-15.7433	f	F0 adults	half-gravid	gambiae	NEG	-3.77889		CC	TT	AA	CC	TT	GG	TT	AA	GG	S	S
09PRA050	2009-11-06	Prabis	Guinea-Bissau	11.8007	-15.7433	f	F0 adults	half-gravid	gambiae	NEG	-4.25795		CC	TT	AC	CC	TT	GG	TT	AA	GG	?;?
09PRA051	2009-11-06	Prabis	Guinea-Bissau	11.8007	-15.7433	f	F0 adults	half-gravid	hybrid	NEG	-5.44923		CT	TA	AC	CT	TA	GA	TG	AG	GT	hybrid	hybrid
09PRA052	2009-11-06	Prabis	Guinea-Bissau	11.8007	-15.7433	f	F0 adults	half-gravid	melas	NEG	-3.93874	Melas
09PRA053	2009-11-06	Prabis	Guinea-Bissau	11.8007	-15.7433	f	F0 adults	half-gravid	coluzzii	NEG	-2.0745		TT	AA	CC	TT	AA	AA	GG	GG	TT	M	M
09PRA054	2009-11-06	Prabis	Guinea-Bissau	11.8007	-15.7433	f	F0 adults	half-gravid	hybrid	NEG	-3.23418		CT	TA	AC	CT	TA	GA	TG	AG	GT	M/hybrid ?	hybrid
09PRA055	2009-11-06	Prabis	Guinea-Bissau	11.8007	-15.7433	f	F0 adults	half-gravid	gambiae	NEG	-2.63928		CC	TT	AA	CC	TT	GG	TT	AA	GG	S/hybrid ?	hybrid
09PRA056	2009-11-06	Prabis	Guinea-Bissau	11.8007	-15.7433	f	F0 adults	half-gravid	hybrid	NEG	-4.09843		CT	TA	AC	CC	TT	GA	TG	AG	GT	hybrid	hybrid
09PRA057	2009-11-06	Prabis	Guinea-Bissau	11.8007	-15.7433	f	F0 adults	half-gravid	coluzzii	NEG	-3.39458		TT	AA	CC	TT	AA	AA	GG	GG	TT	M	M
09PRA058	2009-11-06	Prabis	Guinea-Bissau	11.8007	-15.7433	f	F0 adults	half-gravid	hybrid	NEG	-2.752		CT	TA	AC	CT	TA	GA	TG	AG	GT	M/hybrid ?	S/hybrid
09PRA059	2009-11-06	Prabis	Guinea-Bissau	11.8007	-15.7433	f	F0 adults	half-gravid	hybrid	NEG	-5.06901		CT	TA	AC	CT	TA	GA	TG	AG	GT	hybrid	hybrid
09PRA060	2009-11-06	Prabis	Guinea-Bissau	11.8007	-15.7433	f	F0 adults	half-gravid	gambiae	NEG	-2.83247		CC	TT	AA	CC	TT	GG	TT	AA	GG	S	S
09PRA101	2009-11-06	Prabis	Guinea-Bissau	11.8007	-15.7433	f	F0 adults	half-gravid	gambiae	NEG	-1.99365		CT	TA	AA	CC	TT	GG	TT	AA	GG	M/hybrid ?	hybrid
09PRA102	2009-11-06	Prabis	Guinea-Bissau	11.8007	-15.7433	f	F0 adults	half-gravid	gambiae	NEG	-2.1553		CC	TT	AA	CC	TT	GG	TT	AA	GG	S	S
09PRA104	2009-11-06	Prabis	Guinea-Bissau	11.8007	-15.7433	f	F0 adults	half-gravid	coluzzii	NEG	-3.53881		TT	AA	CC	TT	AA	AA	GG	GG	TT	M	?;?
09PRA105	2009-11-06	Prabis	Guinea-Bissau	11.8007	-15.7433	f	F0 adults	half-gravid	coluzzii	NEG	-3.00934		TT	AA	CC	TT	AA	AA	GG	GG	TT	M	M
09PRA106	2009-11-06	Prabis	Guinea-Bissau	11.8007	-15.7433	f	F0 adults	half-gravid	melas	NEG	-3.87482	Melas
09PRA107	2009-11-06	Prabis	Guinea-Bissau	11.8007	-15.7433	f	F0 adults	half-gravid	gambiae	NEG	-3.8908		CC	TT	AA	CC	TT	GG	TT	AA	GG	S
09PRA108	2009-11-06	Prabis	Guinea-Bissau	11.8007	-15.7433	f	F0 adults	half-gravid	hybrid	NEG	-3.55482		CT	TA	AC	CT	TA	GA	TG	AG	GT	hybrid	hybrid
09PRA110	2009-11-06	Prabis	Guinea-Bissau	11.8007	-15.7433	f	F0 adults	half-gravid	coluzzii	NEG	-2.39747		TT	AA	CC	TT	AA	AA	GG	GG	TT	M
09PRA111	2009-11-06	Prabis	Guinea-Bissau	11.8007	-15.7433	f	F0 adults	half-gravid	gambiae	NEG	-2.23607		CC	TT	AA	CC	TT	GG	TT	AA	GG	S/hybrid ?	S/hybrid ?
09PRA112	2009-11-06	Prabis	Guinea-Bissau	11.8007	-15.7433	f	F0 adults	half-gravid	coluzzii	NEG	-2.26836		TT	AA	CC	TT	AA	AA	GG	GG	TT	M
09PRA113	2009-11-06	Prabis	Guinea-Bissau	11.8007	-15.7433	f	F0 adults	half-gravid	hybrid	NEG	-2.41361		CT	TA	AC	CT	TA	GA	TG	AG	GT	hybrid	hybrid
09PRA114	2009-11-06	Prabis	Guinea-Bissau	11.8007	-15.7433	f	F0 adults	half-gravid	gambiae	NEG	-2.02599		CC	TT	AA	CC	TT	GG	TT	AA	GG	S
09PRA115	2009-11-06	Prabis	Guinea-Bissau	11.8007	-15.7433	f	F0 adults	half-gravid	melas	NEG	-4.57652	Melas
09PRA116	2009-11-06	Prabis	Guinea-Bissau	11.8007	-15.7433	f	F0 adults	half-gravid	gambiae	NEG	-2.62317		CC	TT	AA	CC	TT	GG	TT	AA	GG	S
09PRA117	2009-11-06	Prabis	Guinea-Bissau	11.8007	-15.7433	f	F0 adults	half-gravid	coluzzii	NEG	-1.79945		TT	AA	CC	TT	AA	AA	GG	GG	TT	M
09PRA118	2009-11-06	Prabis	Guinea-Bissau	11.8007	-15.7433	f	F0 adults	half-gravid	melas	NEG	-2.80028	Melas
09PRA119	2009-11-06	Prabis	Guinea-Bissau	11.8007	-15.7433	f	F0 adults	half-gravid	gambiae	NEG	-2.92897		CC	TT	AA	CC	TT	GG	TT	AA	GG	S
09PRA120	2009-11-06	Prabis	Guinea-Bissau	11.8007	-15.7433	f	F0 adults	half-gravid	gambiae	NEG	-2.49424		CC	TT	AA	CC	TT	GG	TT	AA	GG	S
09PRA122	2009-11-06	Prabis	Guinea-Bissau	11.8007	-15.7433	f	F0 adults	half-gravid	gambiae	NEG	-3.39458		CC	TT	AA	CC	TT	GG	TT	AA	GG	S
09PRA124	2009-11-06	Prabis	Guinea-Bissau	11.8007	-15.7433	f	F0 adults	half-gravid	gambiae	NEG	-3.1218		CC	TT	AC	CC	TT	GG	TT	AA	GG	S
09PRA126	2009-11-06	Prabis	Guinea-Bissau	11.8007	-15.7433	f	F0 adults	half-gravid	gambiae	NEG	-3.52564		CC	TT	AA	CC	TT	GG	TT	AA	GG	S
09PRA128	2009-11-06	Prabis	Guinea-Bissau	11.8007	-15.7433	f	F0 adults	half-gravid	gambiae	NEG	-4.00461		CC	TT	AA	CC	TT	GG	TT	AA	GG	S
09PRA129	2009-11-06	Prabis	Guinea-Bissau	11.8007	-15.7433	f	F0 adults	half-gravid	melas	NEG	-1.62075	Melas
09PRA130	2009-11-06	Prabis	Guinea-Bissau	11.8007	-15.7433	f	F0 adults	half-gravid	gambiae	NEG	-3.14186		CC	TT	AA	CC	TT	GG	TT	AA	GG	hybrid	hybrid
09PRA131	2009-11-06	Prabis	Guinea-Bissau	11.8007	-15.7433	f	F0 adults	half-gravid	gambiae	NEG	-1.34979		CC	TT	AA	CC	TT	GG	TT	AA	GG	S
09PRA132	2009-11-06	Prabis	Guinea-Bissau	11.8007	-15.7433	f	F0 adults	half-gravid	hybrid	NEG	-2.60951		CT	TA	AC	CT	TA	GA	TG	AG	GT	hybrid	S
09PRA133	2009-11-06	Prabis	Guinea-Bissau	11.8007	-15.7433	f	F0 adults	half-gravid	gambiae	NEG	-2.87559		CC	TT	AA	CC	TT	GG	TT	AA	GG	S
09PRA134	2009-11-06	Prabis	Guinea-Bissau	11.8007	-15.7433	f	F0 adults	half-gravid	coluzzii	NEG	-2.45877		TT	AA	CC	TT	AA	AA	GG	GG	TT	M
09PRA136	2009-11-06	Prabis	Guinea-Bissau	11.8007	-15.7433	f	F0 adults	half-gravid	hybrid	NEG	-1.34979		CT	TA	AC	CT	TA	GA	TG	AG	GT	hybrid	hybrid
09PRA137	2009-11-06	Prabis	Guinea-Bissau	11.8007	-15.7433	f	F0 adults	half-gravid	gambiae	NEG	-1.72481		CC	TT	AA	CC	TT	GG	TT	AA	GG	S	S
09PRA138	2009-11-06	Prabis	Guinea-Bissau	11.8007	-15.7433	f	F0 adults	half-gravid	gambiae	NEG	-0.996869		CC	TT	AA	CC	TT	GG	TT	AA	GG	S	S
09PRA139	2009-11-06	Prabis	Guinea-Bissau	11.8007	-15.7433	f	F0 adults	half-gravid	hybrid	NEG	-2.51678		CT	TA	AC	CT	TA	GA	TG	AG	GT	hybrid	hybrid
09PRA140	2009-11-06	Prabis	Guinea-Bissau	11.8007	-15.7433	f	F0 adults	half-gravid	gambiae	POS	7.91641											M	M
09PRA141	2009-11-06	Prabis	Guinea-Bissau	11.8007	-15.7433	f	F0 adults	half-gravid	gambiae	NEG	-1.79496											M	M
09PRA142	2009-11-06	Prabis	Guinea-Bissau	11.8007	-15.7433	f	F0 adults	half-gravid	gambiae	NEG	-3.53172		CT	AT	AA			GG	TT	AA	GG	hybrid	hybrid
09PRA143	2009-11-06	Prabis	Guinea-Bissau	11.8007	-15.7433	f	F0 adults	half-gravid	gambiae	NEG	-3.25705											S	S
09PRA144	2009-11-06	Prabis	Guinea-Bissau	11.8007	-15.7433	f	F0 adults	half-gravid	gambiae	NEG	-2.5652											S	S
09PRA145	2009-11-06	Prabis	Guinea-Bissau	11.8007	-15.7433	f	F0 adults	half-gravid	gambiae	NEG	-1.91021											M	M
09PRA146	2009-11-06	Prabis	Guinea-Bissau	11.8007	-15.7433	f	F0 adults	half-gravid	gambiae	NEG	-2.89212											M	M
09PRA147	2009-11-06	Prabis	Guinea-Bissau	11.8007	-15.7433	f	F0 adults	half-gravid	gambiae	NEG	-2.96899											M	M
09PRA148	2009-11-06	Prabis	Guinea-Bissau	11.8007	-15.7433	f	F0 adults	half-gravid	gambiae	POS	29.6025											S	S
09ABU001	2009-11-03	Abu	Guinea-Bissau	11.4614	-15.9141	f	F0 adults	half-gravid	gambiae	NEG	-2.72529		CC	TT	AA	CC	TT	GG	TT	AA	GG	S	S
09ABU002	2009-11-03	Abu	Guinea-Bissau	11.4614	-15.9141	f	F0 adults	half-gravid	coluzzii	NEG	-1.34979		TT	AA	CC	TT	AA	AA	GG	GG	TT	M	M
09ABU003	2009-11-03	Abu	Guinea-Bissau	11.4614	-15.9141	f	F0 adults	blood-fed	gambiae	NEG	-2.02841		CC	TT	AA	CC	TT	GG	TT	AA	GG	H	hybrid
09ABU004	2009-11-03	Abu	Guinea-Bissau	11.4614	-15.9141	f	F0 adults	half-gravid	hybrid	NEG	-1.7482		TT	AA	AC	CT	TA	GA	TG	GG	GT	hybrid	hybrid
09ABU005	2009-11-03	Abu	Guinea-Bissau	11.4614	-15.9141	f	F0 adults	half-gravid	coluzzii	NEG	-2.21476		TT	AA	CC	TT	AA	AA	GG	GG	TT	M	M
09ABU006	2009-11-03	Abu	Guinea-Bissau	11.4614	-15.9141	f	F0 adults	blood-fed	hybrid	NEG	-2.56315		CC	TT	AC	CT	TA	GA	TG	AG	GT	H	hybrid
09ABU008	2009-11-03	Abu	Guinea-Bissau	11.4614	-15.9141	f	F0 adults	half-gravid	gambiae	NEG	-3.29054		CT	TT	AA	CC	TT	GG	TT	AA	GG	?;?	S
09ABU009	2009-11-03	Abu	Guinea-Bissau	11.4614	-15.9141	f	F0 adults	half-gravid	gambiae	NEG	-3.24453		CC	TT	AA	CC	TT	GG	TT	AA	GG	S	S
09ABU011	2009-11-03	Abu	Guinea-Bissau	11.4614	-15.9141	f	F0 adults	half-gravid	gambiae	NEG	-1.90008		CC	TT	AA	CC	TT	GG	TT	AA	GG	S	S
09ABU012	2009-11-03	Abu	Guinea-Bissau	11.4614	-15.9141	f	F0 adults	half-gravid	gambiae	NEG	-1.60777		CC	TT	AA	CC	TT	GG	TT	AA	GG	S	S
09ABU013	2009-11-03	Abu	Guinea-Bissau	11.4614	-15.9141	f	F0 adults	blood-fed	gambiae	NEG	-2.88715		CC	TT	AA	CC	TT	GG	TT	AA	GG	?;?	?;?
09ABU014	2009-11-03	Abu	Guinea-Bissau	11.4614	-15.9141	f	F0 adults	half-gravid	gambiae	NEG	-2.76		CC	TT	AA	CC	TT	GG	TT	AA	GG	S	S
09ABU015	2009-11-03	Abu	Guinea-Bissau	11.4614	-15.9141	f	F0 adults	blood-fed	hybrid	NEG	-2.04007		CT	TA	AC	CT	TA	GA	TG	AG	GT	hybrid	hybrid
09ABU016	2009-11-03	Abu	Guinea-Bissau	11.4614	-15.9141	f	F0 adults	blood-fed	gambiae	NEG	-1.92343		CC	TT	AA	CC	TT	GG	TT	AA	GG	S	S
09ABU017	2009-11-03	Abu	Guinea-Bissau	11.4614	-15.9141	f	F0 adults	blood-fed	gambiae	NEG	-2.51678		CC	TT	AA	CC	TT	GG	TT	AA	GG	S	S
09ABU018	2009-11-03	Abu	Guinea-Bissau	11.4614	-15.9141	f	F0 adults	blood-fed	gambiae sensu lato	NEG	-1.94677	no amplification
09ABU020	2009-11-03	Abu	Guinea-Bissau	11.4614	-15.9141	f	F0 adults	half-gravid	gambiae	NEG	-2.78313		CC	TT	AA	CC	TT	GG	TT	AA	GG	S	S
09ABU021	2009-11-03	Abu	Guinea-Bissau	11.4614	-15.9141	f	F0 adults	blood-fed	gambiae	NEG	-2.43556		CC	TT	AA	CC	TT	GG	TT	AA	GG	S	S
09ABU022	2009-11-03	Abu	Guinea-Bissau	11.4614	-15.9141	f	F0 adults	blood-fed	gambiae	NEG	-3.6578		CC	TT	AC	CC	TT	GG	TT	AA	GG	?;?	?;?
09ABU023	2009-11-03	Abu	Guinea-Bissau	11.4614	-15.9141	f	F0 adults	half-gravid	gambiae	NEG	-2.05172		CC	TT	AA	CC	TA	GG	TT	AA	GG	S	S
09ABU024	2009-11-03	Abu	Guinea-Bissau	11.4614	-15.9141	f	F0 adults	half-gravid	gambiae	NEG	-1.6429		CT	TA	AA	CC	TT	GG	TT	AA	GG	hybrid	hybrid
09ABU025	2009-11-03	Abu	Guinea-Bissau	11.4614	-15.9141	f	F0 adults	half-gravid	coluzzii	POS	538.42		TT	AA	CC	TT	AA	AA	GG	GG	TT	M	M
09ABU026	2009-11-03	Abu	Guinea-Bissau	11.4614	-15.9141	f	F0 adults	blood-fed	coluzzii	NEG	-2.34265		TT	AA	CC	TT	AA	AA	GG	GG	TT	M	M
09ABU027	2009-11-03	Abu	Guinea-Bissau	11.4614	-15.9141	f	F0 adults	blood-fed	coluzzii	NEG	-2.43556		TT	AA	CC	TT	AA	AA	GG	GG	TT	M	M
09ABU028	2009-11-03	Abu	Guinea-Bissau	11.4614	-15.9141	f	F0 adults	blood-fed	coluzzii	NEG	-1.50232		TT	AA	CC	TT	AA	AA	GG	GG	TT	M	M
09ABU029	2009-11-03	Abu	Guinea-Bissau	11.4614	-15.9141	f	F0 adults	blood-fed	gambiae	NEG	-2.65584		CC	TT	AA	CC	TA	GG	TT	AA	GG	H	hybrid
09ABU030	2009-11-03	Abu	Guinea-Bissau	11.4614	-15.9141	f	F0 adults	blood-fed	gambiae	NEG	-2.94488		CC	TT	AA	CC	TT	GG	TT	AA	GG	S	S
09ABU031	2009-11-03	Abu	Guinea-Bissau	11.4614	-15.9141	f	F0 adults	half-gravid	gambiae	NEG	-2.41234		CC	TT	AA	CC	TT	GG	TT	AA	GG	S	S
09ABU033	2009-11-03	Abu	Guinea-Bissau	11.4614	-15.9141	f	F0 adults	half-gravid	gambiae	NEG	-1.2323		CC	TT	AC	CC	TT	GG	TT	AA	GG	S	S
09ABU034	2009-11-03	Abu	Guinea-Bissau	11.4614	-15.9141	f	F0 adults	half-gravid	melas	NEG	-2.49358	Melas
09ABU035	2009-11-03	Abu	Guinea-Bissau	11.4614	-15.9141	f	F0 adults	half-gravid	melas	NEG	-2.56315	Melas
09ABU036	2009-11-03	Abu	Guinea-Bissau	11.4614	-15.9141	f	F0 adults	blood-fed	gambiae	NEG	-3.26753		CT	TA	AA	CC	TT	GG	TT	AA	GG	hybrid	hybrid
09ABU037	2009-11-03	Abu	Guinea-Bissau	11.4614	-15.9141	f	F0 adults	blood-fed	gambiae	NEG	-1.87673		CC	TT	AA	CC	TT	GG	TT	AA	GG	S	S
09ABU070	2009-11-04	Abu	Guinea-Bissau	11.4614	-15.9141	f	F0 adults	half-gravid	hybrid	NEG	-1.6546		CT	TA	AC	CT	TA	GA	TG	AG	GT	hybrid	hybrid
09ABU071	2009-11-04	Abu	Guinea-Bissau	11.4614	-15.9141	f	F0 adults	half-gravid	gambiae sensu lato	NEG	-1.4906	no amplification
09ABU072	2009-11-04	Abu	Guinea-Bissau	11.4614	-15.9141	f	F0 adults	half-gravid	gambiae	NEG	-1.95844		CT	TA	AA	CC	TT	GG	TT	AA	GG	hybrid	hybrid
09ABU073	2009-11-04	Abu	Guinea-Bissau	11.4614	-15.9141	f	F0 adults	half-gravid	coluzzii	NEG	-1.94677		TT	AA	CC	TT	AA	AA	GG	GG	TT	M	M
09ABU074	2009-11-04	Abu	Guinea-Bissau	11.4614	-15.9141	f	F0 adults	half-gravid	hybrid	NEG	-2.44717		CC	TT	AC	CT	TA	GA	TG	AG	GT	hybrid	hybrid
09ABU075	2009-11-04	Abu	Guinea-Bissau	11.4614	-15.9141	f	F0 adults	half-gravid	gambiae	NEG	-2.88715		CC	TT	AA	CC	TT	GG	TT	AA	GG	S	S
09ABU076	2009-11-04	Abu	Guinea-Bissau	11.4614	-15.9141	f	F0 adults	half-gravid	gambiae	NEG	-2.69057		CC	TT	AA	CC	TT	GG	TT	AA	GG	S	S
09ABU077	2009-11-04	Abu	Guinea-Bissau	11.4614	-15.9141	f	F0 adults	half-gravid	gambiae	NEG	-2.23802		CT	TA	AA	CC	TT	GG	TT	AA	GG	hybrid	hybrid
09ABU078	2009-11-04	Abu	Guinea-Bissau	11.4614	-15.9141	f	F0 adults	half-gravid	gambiae	NEG	-2.64426		CT	TA	AA	CC	TT	GG	TT	AA	GG	hybrid	hybrid
09ABU079	2009-11-04	Abu	Guinea-Bissau	11.4614	-15.9141	f	F0 adults	half-gravid	gambiae	NEG	-1.36153		CC	TT	AA	CC	TT	GG	TT	AA	GG	S	S
09ABU080	2009-11-04	Abu	Guinea-Bissau	11.4614	-15.9141	f	F0 adults	half-gravid	gambiae	POS	0.200908		CC	TT	AA	CC	TT	GG	TT	AA	GG	S	S
09ABU081	2009-11-04	Abu	Guinea-Bissau	11.4614	-15.9141	f	F0 adults	blood-fed	gambiae	NEG	-2.50518		CC	TT	AA	CC	TT	GG	TT	AA	GG	H	hybrid
09ABU082	2009-11-04	Abu	Guinea-Bissau	11.4614	-15.9141	f	F0 adults	blood-fed	gambiae	NEG	-2.30779		CC	TT	AA	CC	TT	GG	TT	AA	GG	S	S
09ABU083	2009-11-04	Abu	Guinea-Bissau	11.4614	-15.9141	f	F0 adults	blood-fed	coluzzii	NEG	-2.96797		TT	AA	CC	TT	AA	AA	GG	GG	TT	M	M
09ABU085	2009-11-04	Abu	Guinea-Bissau	11.4614	-15.9141	f	F0 adults	blood-fed	gambiae sensu lato	NEG	-3.23302	no amplification
09ABU086	2009-11-04	Abu	Guinea-Bissau	11.4614	-15.9141	f	F0 adults	blood-fed	gambiae	NEG	-1.90008		CC	TT	AA	CC	TT	GG	TT	AA	GG	S	S
09BRU001	2009-10-28	Brus	Guinea-Bissau	11.2284	-15.8755	f	F0 adults	half-gravid	coluzzii	NEG	-1.58213											M	M		M
09BRU002	2009-10-28	Brus	Guinea-Bissau	11.2284	-15.8755	f	F0 adults	half-gravid	melas	NEG	x	Melas
09BRU003	2009-10-28	Brus	Guinea-Bissau	11.2284	-15.8755	f	F0 adults	half-gravid	melas	NEG	x	Melas
09BRU004	2009-10-28	Brus	Guinea-Bissau	11.2284	-15.8755	f	F0 adults	half-gravid	melas	NEG	-0.923072	Melas
09BRU005	2009-10-28	Brus	Guinea-Bissau	11.2284	-15.8755	f	F0 adults	half-gravid	melas	NEG	-1.34232	Melas
09BRU006	2009-10-28	Brus	Guinea-Bissau	11.2284	-15.8755	f	F0 adults	half-gravid	gambiae	NEG	-1.82696											S
09BRU007	2009-10-28	Brus	Guinea-Bissau	11.2284	-15.8755	f	F0 adults	half-gravid	melas	NEG	-1.90568	Melas
09BRU008	2009-10-28	Brus	Guinea-Bissau	11.2284	-15.8755	f	F0 adults	half-gravid	melas	NEG	-1.21795	Melas
09BRU009	2009-10-28	Brus	Guinea-Bissau	11.2284	-15.8755	f	F0 adults	half-gravid	gambiae	NEG	-1.71922	Gambiae											no amplification	S
09BRU010	2009-10-28	Brus	Guinea-Bissau	11.2284	-15.8755	f	F0 adults	half-gravid	gambiae	NEG	-1.15923		CC	TT	AA	CC	TT	GG	TT	AA	GG	S	S		S
09BRU011	2009-10-29	Brus	Guinea-Bissau	11.2284	-15.8755	f	F0 adults	half-gravid	gambiae	NEG	-1.36153		TC	AT	CA	CC	TT	GG	TT	AA	GG	hybrid
09BRU012	2009-10-29	Brus	Guinea-Bissau	11.2284	-15.8755	f	F0 adults	half-gravid	gambiae	NEG	-2.51678	Gambiae											no amplification	S
09ANA001	2009-10-30	Ponta Anabaca	Guinea-Bissau	11.1811	-16.1398	f	F0 adults	blood-fed	gambiae	POS	0.608354	Gambiae											S	S
09ANA002	2009-10-30	Ponta Anabaca	Guinea-Bissau	11.1811	-16.1398	f	F0 adults	blood-fed	gambiae	NEG	-2.12229	Gambiae											no amplification	S
09ANA003	2009-10-30	Ponta Anabaca	Guinea-Bissau	11.1811	-16.1398	f	F0 adults	blood-fed	gambiae	NEG	-2.06446	Gambiae											no amplification	S
09ANA004	2009-10-30	Ponta Anabaca	Guinea-Bissau	11.1811	-16.1398	f	F0 adults	blood-fed	gambiae	NEG	-3.52564	Gambiae											no amplification	S
09ANA005	2009-10-30	Ponta Anabaca	Guinea-Bissau	11.1811	-16.1398	f	F0 adults	blood-fed	gambiae	NEG	-2.68063	Gambiae											no amplification	S
09ANA006	2009-10-30	Ponta Anabaca	Guinea-Bissau	11.1811	-16.1398	f	F0 adults	blood-fed	gambiae	NEG	x	Gambiae											no amplification	S
09ANA007	2009-10-30	Ponta Anabaca	Guinea-Bissau	11.1811	-16.1398	f	F0 adults	blood-fed	gambiae	NEG	x	Gambiae											no amplification	S
09ANA008	2009-10-30	Ponta Anabaca	Guinea-Bissau	11.1811	-16.1398	f	F0 adults	blood-fed	gambiae	POS	10.6453	Gambiae											no amplification	S
09ANA009	2009-10-30	Ponta Anabaca	Guinea-Bissau	11.1811	-16.1398	f	F0 adults	blood-fed	gambiae	NEG	x	Gambiae											no amplification	S
09ANA010	2009-10-30	Ponta Anabaca	Guinea-Bissau	11.1811	-16.1398	f	F0 adults	blood-fed	gambiae	NEG	-1.71727	Gambiae											no amplification	S
09ANA011	2009-10-30	Ponta Anabaca	Guinea-Bissau	11.1811	-16.1398	f	F0 adults	blood-fed	gambiae	NEG	-3.46811	Gambiae											no amplification	S
09ANA012	2009-10-30	Ponta Anabaca	Guinea-Bissau	11.1811	-16.1398	f	F0 adults	blood-fed	gambiae	NEG	-2.48822	Gambiae											no amplification	S
09ANA022	2009-11-01	Ponta Anabaca	Guinea-Bissau	11.1811	-16.1398	f	F0 adults	half-gravid	gambiae	NEG	-3.679	Gambiae											no amplification	S
09ANA023	2009-11-01	Ponta Anabaca	Guinea-Bissau	11.1811	-16.1398	f	F0 adults	half-gravid	gambiae	NEG	-5.83616	Gambiae											no amplification	S
09ANA024	2009-11-01	Ponta Anabaca	Guinea-Bissau	11.1811	-16.1398	f	F0 adults	half-gravid	gambiae	NEG	-2.52672	Gambiae											no amplification	S
09ANA025	2009-11-01	Ponta Anabaca	Guinea-Bissau	11.1811	-16.1398	f	F0 adults	half-gravid	gambiae	POS	0.764076	Gambiae											S	S
09ANA026	2009-11-01	Ponta Anabaca	Guinea-Bissau	11.1811	-16.1398	f	F0 adults	blood-fed	gambiae	NEG	x	Gambiae											no amplification	S
09ANA027	2009-11-01	Ponta Anabaca	Guinea-Bissau	11.1811	-16.1398	f	F0 adults	blood-fed	gambiae	POS	19.84	Gambiae											no amplification	S
09ANA028	2009-11-01	Ponta Anabaca	Guinea-Bissau	11.1811	-16.1398	f	F0 adults	half-gravid	gambiae	NEG	-3.64067	Gambiae											no amplification	S
09ANA029	2009-11-01	Ponta Anabaca	Guinea-Bissau	11.1811	-16.1398	f	F0 adults	blood-fed	gambiae	NEG	x	Gambiae											no amplification	S
09ANA030	2009-11-01	Ponta Anabaca	Guinea-Bissau	11.1811	-16.1398	f	F0 adults	blood-fed	gambiae	NEG	-3.33382	Gambiae											no amplification	S
09ANA031	2009-11-01	Ponta Anabaca	Guinea-Bissau	11.1811	-16.1398	f	F0 adults	blood-fed	gambiae	NEG	-4.50187	Gambiae											no amplification	S
09ANA032	2009-11-01	Ponta Anabaca	Guinea-Bissau	11.1811	-16.1398	f	F0 adults	blood-fed	gambiae	NEG	-3.79397	Gambiae											no amplification	S
09ANA033	2009-11-01	Ponta Anabaca	Guinea-Bissau	11.1811	-16.1398	f	F0 adults	blood-fed	gambiae	NEG	-2.91134	Gambiae											no amplification	S
09ANA034	2009-11-01	Ponta Anabaca	Guinea-Bissau	11.1811	-16.1398	f	F0 adults	half-gravid	gambiae	POS	2.34555	Gambiae											no amplification	S
09ANA035	2009-11-01	Ponta Anabaca	Guinea-Bissau	11.1811	-16.1398	f	F0 adults	blood-fed	gambiae	POS	7.7798	Gambiae											no amplification	S
09ANA036	2009-11-01	Ponta Anabaca	Guinea-Bissau	11.1811	-16.1398	f	F0 adults	blood-fed	gambiae	NEG	-3.52564	Gambiae											no amplification	S
09ANA037	2009-11-01	Ponta Anabaca	Guinea-Bissau	11.1811	-16.1398	f	F0 adults	blood-fed	gambiae	NEG	-3.679	Gambiae											no amplification	S
09ANA038	2009-11-01	Ponta Anabaca	Guinea-Bissau	11.1811	-16.1398	f	F0 adults	blood-fed	gambiae	NEG	-3.77481	Gambiae											no amplification	S
09ANA039	2009-11-01	Ponta Anabaca	Guinea-Bissau	11.1811	-16.1398	f	F0 adults	blood-fed	gambiae	NEG	-7.91974	Gambiae											no amplification	S
09ANA040	2009-11-01	Ponta Anabaca	Guinea-Bissau	11.1811	-16.1398	f	F0 adults	blood-fed	gambiae	NEG	-3.52564	Gambiae											no amplification	S
09ANA041	2009-11-01	Ponta Anabaca	Guinea-Bissau	11.1811	-16.1398	f	F0 adults	blood-fed	gambiae	NEG	-2.29568	Gambiae											no amplification	S
09ANA042	2009-11-01	Ponta Anabaca	Guinea-Bissau	11.1811	-16.1398	f	F0 adults	blood-fed	gambiae	NEG	-2.75756	Gambiae											no amplification	S
09ANA043	2009-11-01	Ponta Anabaca	Guinea-Bissau	11.1811	-16.1398	f	F0 adults	blood-fed	gambiae	NEG	-2.12229	Gambiae											no amplification	S
09ANA044	2009-11-01	Ponta Anabaca	Guinea-Bissau	11.1811	-16.1398	f	F0 adults	blood-fed	gambiae	NEG	-2.77678	Gambiae											no amplification	S
09ANA045	2009-11-01	Ponta Anabaca	Guinea-Bissau	11.1811	-16.1398	f	F0 adults	blood-fed	gambiae	NEG	-3.77481	Gambiae											no amplification	S
09ANA046	2009-11-01	Ponta Anabaca	Guinea-Bissau	11.1811	-16.1398	f	F0 adults	blood-fed	gambiae	NEG	-2.60368	Gambiae											no amplification	S
09ANA047	2009-11-01	Ponta Anabaca	Guinea-Bissau	11.1811	-16.1398	f	F0 adults	blood-fed	gambiae	NEG	-3.92804	Gambiae											no amplification	S
09ANA048	2009-11-01	Ponta Anabaca	Guinea-Bissau	11.1811	-16.1398	f	F0 adults	blood-fed	gambiae	NEG	-3.31463	Gambiae											no amplification	S
09ANA049	2009-11-01	Ponta Anabaca	Guinea-Bissau	11.1811	-16.1398	f	F0 adults	blood-fed	gambiae	NEG	-3.44893	Gambiae											no amplification	S
09ANA050	2009-11-01	Ponta Anabaca	Guinea-Bissau	11.1811	-16.1398	f	F0 adults	blood-fed	gambiae	NEG	x	Gambiae											no amplification	S
09ANA051	2009-11-01	Ponta Anabaca	Guinea-Bissau	11.1811	-16.1398	f	F0 adults	blood-fed	gambiae	NEG	-2.19937	Gambiae											no amplification	S
09ANA052	2009-11-01	Ponta Anabaca	Guinea-Bissau	11.1811	-16.1398	f	F0 adults	blood-fed	gambiae	NEG	-3.08425	Gambiae											no amplification	S
09ANA053	2009-11-01	Ponta Anabaca	Guinea-Bissau	11.1811	-16.1398	f	F0 adults	blood-fed	gambiae	POS	1.46588	Gambiae											no amplification	S
09ANA054	2009-11-01	Ponta Anabaca	Guinea-Bissau	11.1811	-16.1398	f	F0 adults	blood-fed	gambiae	NEG	-3.94718	no amplification
09ANA055	2009-11-01	Ponta Anabaca	Guinea-Bissau	11.1811	-16.1398	f	F0 adults	blood-fed	gambiae	POS	14.9435	Gambiae											no amplification	S
09ANA056	2009-11-01	Ponta Anabaca	Guinea-Bissau	11.1811	-16.1398	f	F0 adults	blood-fed	gambiae	NEG	x	Gambiae											no amplification	S
09ANA057	2009-11-01	Ponta Anabaca	Guinea-Bissau	11.1811	-16.1398	f	F0 adults	blood-fed	gambiae	NEG	-2.93056	Gambiae											S	S
09ANA058	2009-11-01	Ponta Anabaca	Guinea-Bissau	11.1811	-16.1398	f	F0 adults	blood-fed	gambiae	NEG	-3.14186	Gambiae											no amplification	S
09ANA060	2009-11-01	Ponta Anabaca	Guinea-Bissau	11.1811	-16.1398	f	F0 adults	blood-fed	gambiae	NEG	-3.73649	Gambiae											S	S
09ANA061	2009-11-01	Ponta Anabaca	Guinea-Bissau	11.1811	-16.1398	f	F0 adults	blood-fed	gambiae	NEG	-4.27248	Gambiae											S	S
09ANA062	2009-11-01	Ponta Anabaca	Guinea-Bissau	11.1811	-16.1398	f	F0 adults	blood-fed	gambiae	NEG	-3.60233	Gambiae											no amplification	S
09ANA063	2009-11-01	Ponta Anabaca	Guinea-Bissau	11.1811	-16.1398	f	F0 adults	blood-fed	gambiae	NEG	x	Gambiae											no amplification	S
09ANA064	2009-11-01	Ponta Anabaca	Guinea-Bissau	11.1811	-16.1398	f	F0 adults	blood-fed	gambiae	NEG	-2.91134	Gambiae											no amplification	S
09ETI001	2009-10-31	Eticoga	Guinea-Bissau	11.1588	-16.1427	f	F0 adults	half-gravid	hybrid	NEG	-2.24965		CC	AT	??	??	??	GA	TT	??	GG	hybrid/S ?	hybrid
09ETI002	2009-10-31	Eticoga	Guinea-Bissau	11.1588	-16.1427	f	F0 adults	half-gravid	coluzzii	NEG	-2.10998											M	M		M
09ETI003	2009-10-31	Eticoga	Guinea-Bissau	11.1588	-16.1427	f	F0 adults	half-gravid	gambiae	NEG	-2.43556		CC	TT	AA	CC	TT	GG	TT	AA	GG	hybrid/S ?	S
09ETI004	2009-10-31	Eticoga	Guinea-Bissau	11.1588	-16.1427	f	F0 adults	half-gravid	gambiae	NEG	-2.08668		CC	TT	AA	CC	TT	GG	TT	AA	GG	S	S		S
09ETI005	2009-10-31	Eticoga	Guinea-Bissau	11.1588	-16.1427	f	F0 adults	half-gravid	gambiae	NEG	-1.71311		CC	TT	AA	CC	TT	GG	TT	AA	GG	hybrid/S ?	hybrid
09ETI006	2009-10-31	Eticoga	Guinea-Bissau	11.1588	-16.1427	f	F0 adults	blood-fed	gambiae	NEG	-2.34265		TC	AT	AA	CC	TT	GG	TT	AA	GG	S	S
09ETI007	2009-10-31	Eticoga	Guinea-Bissau	11.1588	-16.1427	f	F0 adults	blood-fed	gambiae	POS	0.559535		CC	TT	AA	CC	TT	GG	TT	AA	GG	S	S
09ETI008	2009-10-31	Eticoga	Guinea-Bissau	11.1588	-16.1427	f	F0 adults	blood-fed	melas	NEG	-2.42395	Melas
09ETI009	2009-10-31	Eticoga	Guinea-Bissau	11.1588	-16.1427	f	F0 adults	blood-fed	hybrid	NEG	-2.3775		CC	TT	??	??	AT	GA	TT	??	??	S	S
09ETI010	2009-10-31	Eticoga	Guinea-Bissau	11.1588	-16.1427	f	F0 adults	blood-fed	gambiae	NEG	-1.45542		CC	TT	AA	CC	AT	GG	TT	AA	GG	S	S
09ETI011	2009-10-31	Eticoga	Guinea-Bissau	11.1588	-16.1427	f	F0 adults	blood-fed	gambiae	POS	18.1748		CC	TT	AA	CC	TT	GG	TT	AA	GG	S	S
09ETI015	2009-11-01	Eticoga	Guinea-Bissau	11.1588	-16.1427	f	F0 adults	half-gravid	gambiae	POS	0.703351	Gambiae											no amplification	S

## Sheet: Column description
Column names	Description
banked_sample_id	unique sample id
coldate	date when sample was collected in Guinea-Bissau
collection_site	town where sample was collected
country	country of origin
collection_site_lat	collection site latitude
collection_site_long	collection site longitude
sex	sex
life_stage	life stage of specimen at time of collection
food_state	half-gravid refers to the state where blood meal is 60-70% diggested; blood fed refers to mosquitoes that had blood in its abdomen at time of collection but not half-gravid
Species	consensus species designation from multiple assays
Plasmodium falciparum Infection	POS refers to mosquitoes infected with Plasmodium falciparum detected by the presence of circumsprozoite protein in its head/thorax tissue. NEG refers uninfected mosquitoes
CSP concentration	concentration of circumsprozoite protein measured from CSP-ELISA.
Scott PCR	Species diagnostic PCR result that distinguishes A. arabiensis, A. melas and A. gambiae s.s. (A. coluzzii + A. gambiae )
28SIGS-540	Result of a divergence island SNP on X using iplex; also the same marker that Fanello or Favia uses to distinguish A. coluzzii from A. gambiae
28SIGS-649	Result of a divergence island SNP on X using iplex
01039-358	Result of a divergence island SNP on X using iplex
01061-057	Result of a divergence island SNP on X using iplex
01061-488	Result of a divergence island SNP on X using iplex
01070-211	Result of a divergence island SNP on X using iplex
01073-073	Result of a divergence island SNP on X using iplex
01073-213	Result of a divergence island SNP on X using iplex
01076-129	Result of a divergence island SNP on X using iplex
28S_Fanello	Species diagnostic RFLP result that distinguishes A. coluzzii and A. gambiae
28S_Favia	Species diagnostic PCR result that distinguishes A. coluzzii and A. gambiae
SINEX	Species diagnostic PCR result that distinguishes A. coluzzii and A. gambiae
28S_Seq	species designation by sequencing 28S IGS regions using conventional sanger sequencing platform.
